# Supplementary material for: Laser ionization/time-of-flight mass spectrometry for the direct analysis of emulsions
Source: Royal Society of Chemistry journal article supplement (doi:10.1039/c4ay00633j), 2014-01-01
Supplement: c4ay00633j1.pdf [file c4ay00633j1.pdf]

# **Laser ionization/time-of-flight mass spectrometry for the direct analysis of emulsions**

*Supplemental information*

**Hidaka Ishigami, Yukihiro Tsuda and Tomohiro Uchimura\***

Department of Materials Science and Engineering, Graduate School of Engineering, University  
of Fukui, 3-9-1 Bunkyo, Fukui 910-8507, Japan

\* To whom correspondence should be addressed. E-mail: [uchimura@matse.u-fukui.ac.jp](mailto:uchimura@matse.u-fukui.ac.jp)

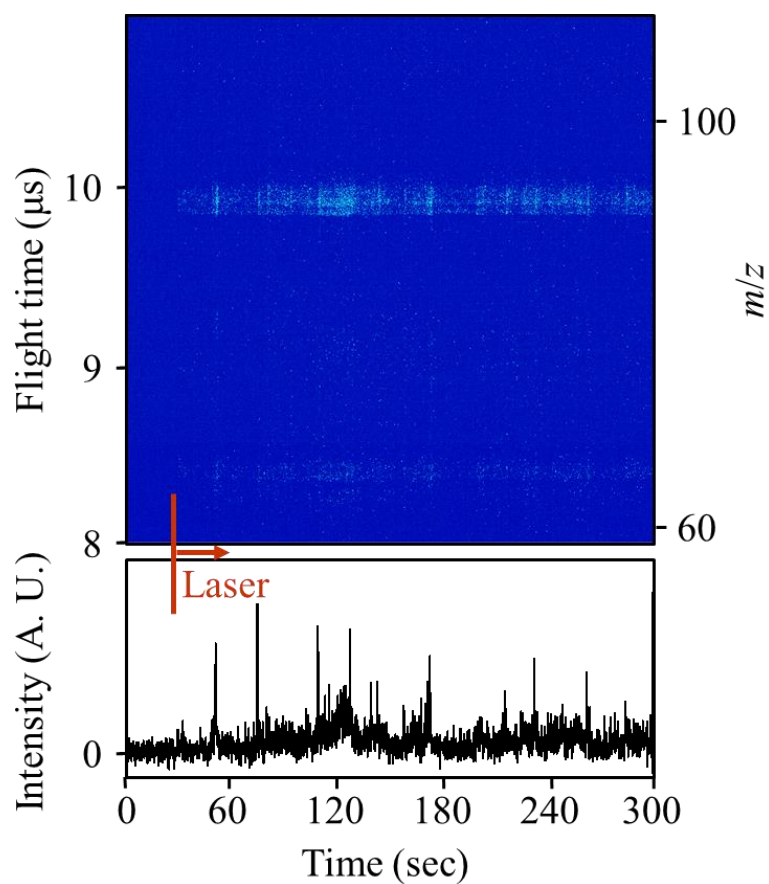

Figure S1 Two-dimensional display for a microemulsion obtained using a pair of concentric capillaries where the inner diameters of the inner and outer capillaries were 50 and 200  $\mu\text{m}$ , respectively. The time course of the peak area of toluene ion is also shown. Concentration: 400  $\text{ng}/\mu\text{L}$  for toluene, 6,600  $\text{ng}/\mu\text{L}$  for SDS, and 3,000  $\text{ng}/\mu\text{L}$  for 1-pentanol.
